# Supplementary material for: Obesity in Children and Adolescents during COVID-19 Pandemic
Source: PubMed Central journal article supplement (PMC7918914; doi:10.3390/children8020135), 2021-02-12
Supplement: children-08-00135-s001.pdf [file children-08-00135-s001.pdf]

**Table S1.** Newcastle Ottawa Scale for cross-sectional and cohort studies.

| Cross-sectional studies     |                                  |                                                 |                                                                                      |                                                                                                                                                                                                                                                                             |                                                                                                                                     |                       |                                                                                                                                                                                              |       |
|-----------------------------|----------------------------------|-------------------------------------------------|--------------------------------------------------------------------------------------|-----------------------------------------------------------------------------------------------------------------------------------------------------------------------------------------------------------------------------------------------------------------------------|-------------------------------------------------------------------------------------------------------------------------------------|-----------------------|----------------------------------------------------------------------------------------------------------------------------------------------------------------------------------------------|-------|
|                             | Selection                        |                                                 |                                                                                      |                                                                                                                                                                                                                                                                             | Comparability                                                                                                                       | Outcome               |                                                                                                                                                                                              | Total |
| First author (year)         | Representativeness of the sample | Sample size                                     | Non-respondents                                                                      | Ascertainment of exposure                                                                                                                                                                                                                                                   | The subjects in different outcome groups are comparable, based on the study design or analysis. Confounding factors are controlled. | Assessment of outcome | Statistical test                                                                                                                                                                             |       |
| Di Renzo L et al. (2020)    | *                                | *                                               | *                                                                                    | **                                                                                                                                                                                                                                                                          | **                                                                                                                                  | *                     | *                                                                                                                                                                                            | 9/10  |
|                             | Truly representative             | 3,533 Italian citizens, 674 students among them | A total of $n = 4,500$ participants started the survey, $n = 3,533$ considered valid | The EHLC-COVID19 questionnaire was specifically built by using Google Form by the Section of Clinical Nutrition and Nutrigenomic, Department of Biomedicine and Prevention of the University of Rome Tor Vergata and the MEDAS questionnaire to assess adherence to the MD. | Residence region, age, gender, BMI, current employment                                                                              | Self report           | The Shapiro–Wilk test, the Spearman correlation coefficient, Chi square test, McNeman analysis, Mann–Whitney U and Kruskal–Wallis tests, binary and multinomial logistic regression analyses |       |
| Ruiz-Rosso MB et al. (2020) | *                                | *                                               | *                                                                                    | **                                                                                                                                                                                                                                                                          | **                                                                                                                                  | *                     | *                                                                                                                                                                                            | 9/10  |

|                                      |                      |                                                                |                                                                      |                                                                                                                                                                                                                                                                                    |                                                                                                                           |                             |                                                                                                                                  |      |
|--------------------------------------|----------------------|----------------------------------------------------------------|----------------------------------------------------------------------|------------------------------------------------------------------------------------------------------------------------------------------------------------------------------------------------------------------------------------------------------------------------------------|---------------------------------------------------------------------------------------------------------------------------|-----------------------------|----------------------------------------------------------------------------------------------------------------------------------|------|
|                                      | Truly representative | 820 adolescents                                                | From a total of $n = 828$ eligible in the final sample was $n = 820$ | Dietary practices were evaluated using a standardized adolescent questionnaire, the National School Health Survey–PeNSE; Pesquisa Nacional de Saúde do Escolar, which was slightly modified                                                                                        | Age, gender, country, maternal education, number of family members, watching TV during mealtimes                          | Self report                 | Paired two-way Student's t-test, two-way ANOVA. A significance level of $p < 0.05$ was applied to all statistical analyses.      |      |
| Ruiz-Rosso MB et al. (2020) 32751721 | *                    | *                                                              | *                                                                    | **                                                                                                                                                                                                                                                                                 | **                                                                                                                        | *                           | *                                                                                                                                | 9/10 |
|                                      | Truly representative | 726 adolescents                                                | Among those, eight (1.1%) declined to participate.                   | To assess the level of physical activity, the International Physical Activity Questionnaire (IPAQ) was used. For ultra-processed food consumption, was considered the assessment of the weekly consumption of ultra-processed foods, so named according to the NOVA classification | Country, sex, physical activity status, ultra-processed food consumption, maternal education, number of residents at home | Self report                 | Chi-squared tests, multinomial logistic regression model and univariate logistic regression were used                            |      |
| Fernández-Aranda F et al. (2020)     | *                    | *                                                              | -                                                                    | *                                                                                                                                                                                                                                                                                  | **                                                                                                                        | **                          | *                                                                                                                                | 8/10 |
|                                      | Truly representative | 121 participants (87 ED patients and 34 patients with obesity) | No description                                                       | COVID Isolation Eating Scale (CIES), a newly created scale for measuring the impact of confinement                                                                                                                                                                                 | Sex, age, eating disorders diagnosis, obesity                                                                             | Record linkage, self report | Confirmatory factor analyses, paired-sample t-tests for interval scaled variables, and the McNemar test for categorical measures |      |
| Adams EL et al. (2020)               | *                    | *                                                              | *                                                                    | **                                                                                                                                                                                                                                                                                 | **                                                                                                                        | *                           | *                                                                                                                                | 9/10 |

|                               |                             |                        |                                                                                                                                                                                                                                          |                                                                                                                  |                                                                   |             |                                                                                                                                    |      |
|-------------------------------|-----------------------------|------------------------|------------------------------------------------------------------------------------------------------------------------------------------------------------------------------------------------------------------------------------------|------------------------------------------------------------------------------------------------------------------|-------------------------------------------------------------------|-------------|------------------------------------------------------------------------------------------------------------------------------------|------|
|                               | Somewhat representative     | 584 parents            | A total of $n = 1,342$ parents started the survey, $n = 584$ considered valid                                                                                                                                                            | 6-item United States Department of Agriculture Household Food Security Module, Child Feeding Questionnaire (CFQ) | Parents age, children age, race, marital status                   | Self report | Chi-square test, Paired sample t-tests, univariate regression models                                                               |      |
| Fernandez-Rio J et al. (2020) | *                           | *                      | -                                                                                                                                                                                                                                        | *                                                                                                                | **                                                                | *           | *                                                                                                                                  | 7/10 |
|                               | Snowball sampling           | 4379 Spanish citizens  | No description                                                                                                                                                                                                                           | On-line questionnaire                                                                                            | Sex, age, BMI, depressive symptoms, optimism                      | Self report | Chi-square test, multinomial logistic regression analyses, restricted cubic splines models                                         |      |
| Sidor A and Rzymiski R (2020) | -                           | *                      | -                                                                                                                                                                                                                                        | *                                                                                                                | **                                                                | *           | *                                                                                                                                  | 6/10 |
|                               | Specific group of subjects  | 1097 Polish citizens   | No description                                                                                                                                                                                                                           | Online self-designed, structured questionnaire                                                                   | Age, gender, weight, bmi, occupation                              | Self report | Mann-Whitney U test or Kruskal-Wallis analysis of variance (ANOVA) with Dunn's post-hoc method                                     |      |
| Rolland et al. (2020)         | -                           | *                      | *                                                                                                                                                                                                                                        | *                                                                                                                | **                                                                | *           | *                                                                                                                                  | 7/10 |
|                               | Convenience sampling method | 11.391 French citizens | Among the 20,235 participants who started the questionnaire, 11,742 (58.0%) completed it. After excluding inoperable questionnaires and respondents from countries other than France, 11,391/20,235 questionnaires (56.3%) were included | Online questionnaire                                                                                             | Age, gender, marital status, employment status, educational level | Self report | Logistic regression models, raw odds ratios (ORs) and adjusted odds ratios (aORs) are provided with their 95% confidence intervals |      |

|  |  |  |                 |  |  |  |  |  |  |
|--|--|--|-----------------|--|--|--|--|--|--|
|  |  |  | in the analyses |  |  |  |  |  |  |
|--|--|--|-----------------|--|--|--|--|--|--|

| Cohort studies                  |                                                                       |                                     |                                  |                                                                              |                                                                                                         |                       |                                                 |                                  |              |
|---------------------------------|-----------------------------------------------------------------------|-------------------------------------|----------------------------------|------------------------------------------------------------------------------|---------------------------------------------------------------------------------------------------------|-----------------------|-------------------------------------------------|----------------------------------|--------------|
| Selection                       |                                                                       |                                     |                                  |                                                                              | Comparability                                                                                           | Outcome               |                                                 |                                  | Total        |
| First author (year)             | Representativeness of the exposed cohort                              | Selection of the non-exposed cohort | Ascertainment of exposure        | Demonstration that outcome of interest was not present at start of study     | Comparability of cohorts on the basis of the design or analysis controlled for confounders              | Assessment of outcome | Was follow-up long enough for outcomes to occur | Adequacy of follow-up of cohorts |              |
| Pietrobelli A et al. (2020)     | *                                                                     | *                                   | *                                | -                                                                            | *                                                                                                       | -                     | *                                               | *                                | good quality |
|                                 | Children and adolescents with obesity (range, 6–18) years             | Same community                      | Structured interview             | No                                                                           | Sex, age, living area                                                                                   | Telephone interview   | Yes                                             | Complete follow up               |              |
| Dunton GF, Do B, Wang SD (2020) | *                                                                     | *                                   | *                                | *                                                                            | **                                                                                                      | -                     | *                                               | *                                | good quality |
|                                 | Children 5 to 13 years, with an average age of 8.71 years (SD = 2.58) | Same community                      | Structure interview, self report | Pre-COVID-period (February 20,200 and early-COVID-19 period (April–May 2020) | Parental age,sex, marital status, work status, annual household income, child age, sex, ethnicity, race | Self report           | Yes                                             | Complete follow up               |              |

|                        |                          |                |                                                       |    |                                                   |                |     |                    |              |
|------------------------|--------------------------|----------------|-------------------------------------------------------|----|---------------------------------------------------|----------------|-----|--------------------|--------------|
| An R (2020)            | *                        | *              | *                                                     | -  | **                                                | *              | *   | *                  | good quality |
|                        | Children 5-6 years in US | Same community | ECLS-K:2011                                           | No | Sex, racial/ethnic differences, physical activity | Record linkage | Yes | Complete follow up |              |
| Jia P et al. (2020)    | *                        | *              | *                                                     | -  | **                                                | -              | -   | *                  | fair quality |
|                        | Youths in China          | Same community | COVID-19 Impact on Lifestyle Change Survey (COINLICS) | No | Sex, age, ethnic group, living areas              | Self report    | No  | Complete follow up |              |
| Allabadi et al. (2020) | *                        | *              | *                                                     | -  | **                                                | -              | -   | *                  | fair quality |
|                        | Ain Palestine            | Same community | Structure interview, self report                      | No | Sex, age, marital status, education               | Self report    | No  | Complete follow up |              |
| Yang S. et al. (2020)  | *                        | *              | *                                                     | -  | **                                                | -              | -   | *                  | fair quality |
|                        | Youths in China          | Same community | COVID-19 Impact on Lifestyle Change Survey (COINLICS) | No | Sex, age, education, ethnic group, living areas   | Self report    | No  | Complete follow up |              |
| Dutta M (2020)         | *                        | *              | *                                                     | -  | *                                                 | *              | -   | -                  | poor quality |
|                        | Schoolage children USA   | Same community | COVID-19 tracking project                             | No | Age                                               | Record linkage | No  | No statement       |              |
